# Supplementary material
Source: publisher figshare collection journal article supplement (https://acs.figshare.com/ndownloader/files/4152439)
Supplement: Supplementary file 1 [file 4152439]

SUPPORTING INFORMATION

For

**Time Resolved Infrared Spectroscopy.  
Kinetic Studies of Weakly Binding Ligands  
in an Iron-Iron Hydrogenase Model  
Compound.**

Sohail Muhammad<sup>†</sup>, Salvador Moncho<sup>†</sup>, Edward N. Brothers<sup>†</sup>,  
Marcetta Y. Darensbourg<sup>‡</sup>, Donald J. Darensbourg<sup>\*,‡</sup> and Ashfaq A. Bengali<sup>\*,†</sup>

*Department of Chemistry, Texas A&M University at Qatar, Doha, Qatar.*<sup>†</sup>

*Department of Chemistry, Texas A&M University, College Station, Texas 77843,*<sup>‡</sup>

**S2-S5** - Difference IR spectra for several **1**-Solv and **1**-L complexes.

**S6** - Plot of  $k_{\text{obs}}$  vs. [pyridine] for the displacement of DHF from **1**-( $\eta^2$ -DHF).

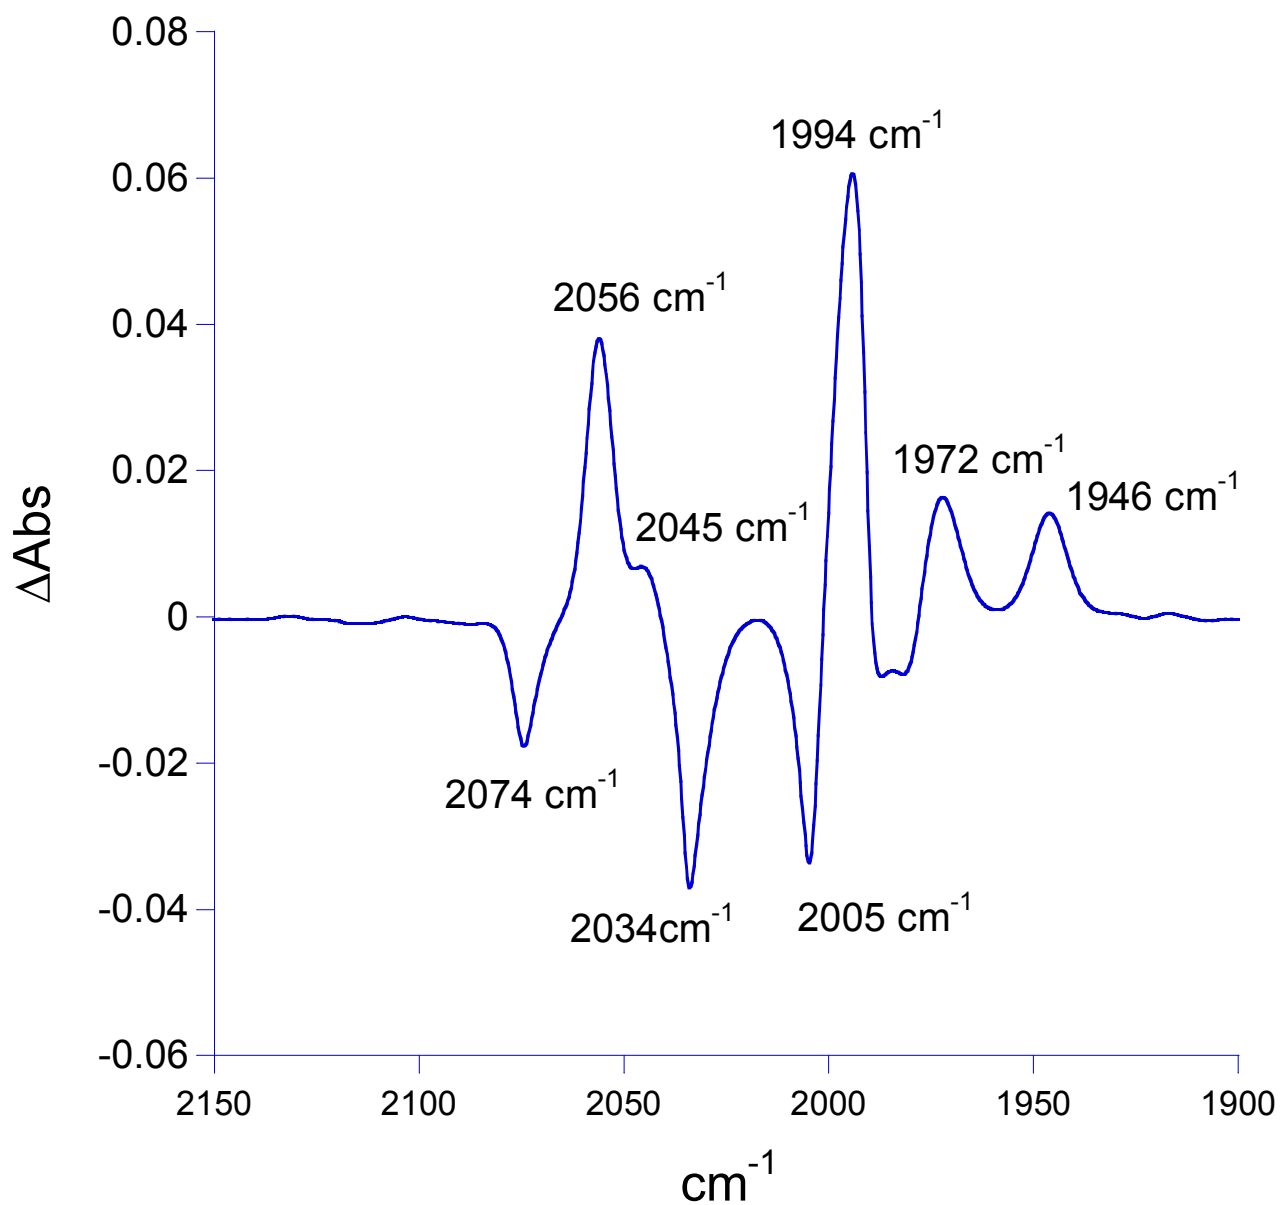

**Figure S-1:** Difference FTIR spectrum following photolysis of a cyclohexane solution of **1**-CO in the presence of 3-hexyne at 293K. Positive peaks are due to the **1**-( $\eta^2$ -3-hexyne) adduct while negative peaks are due to depletion of the parent upon photolysis.

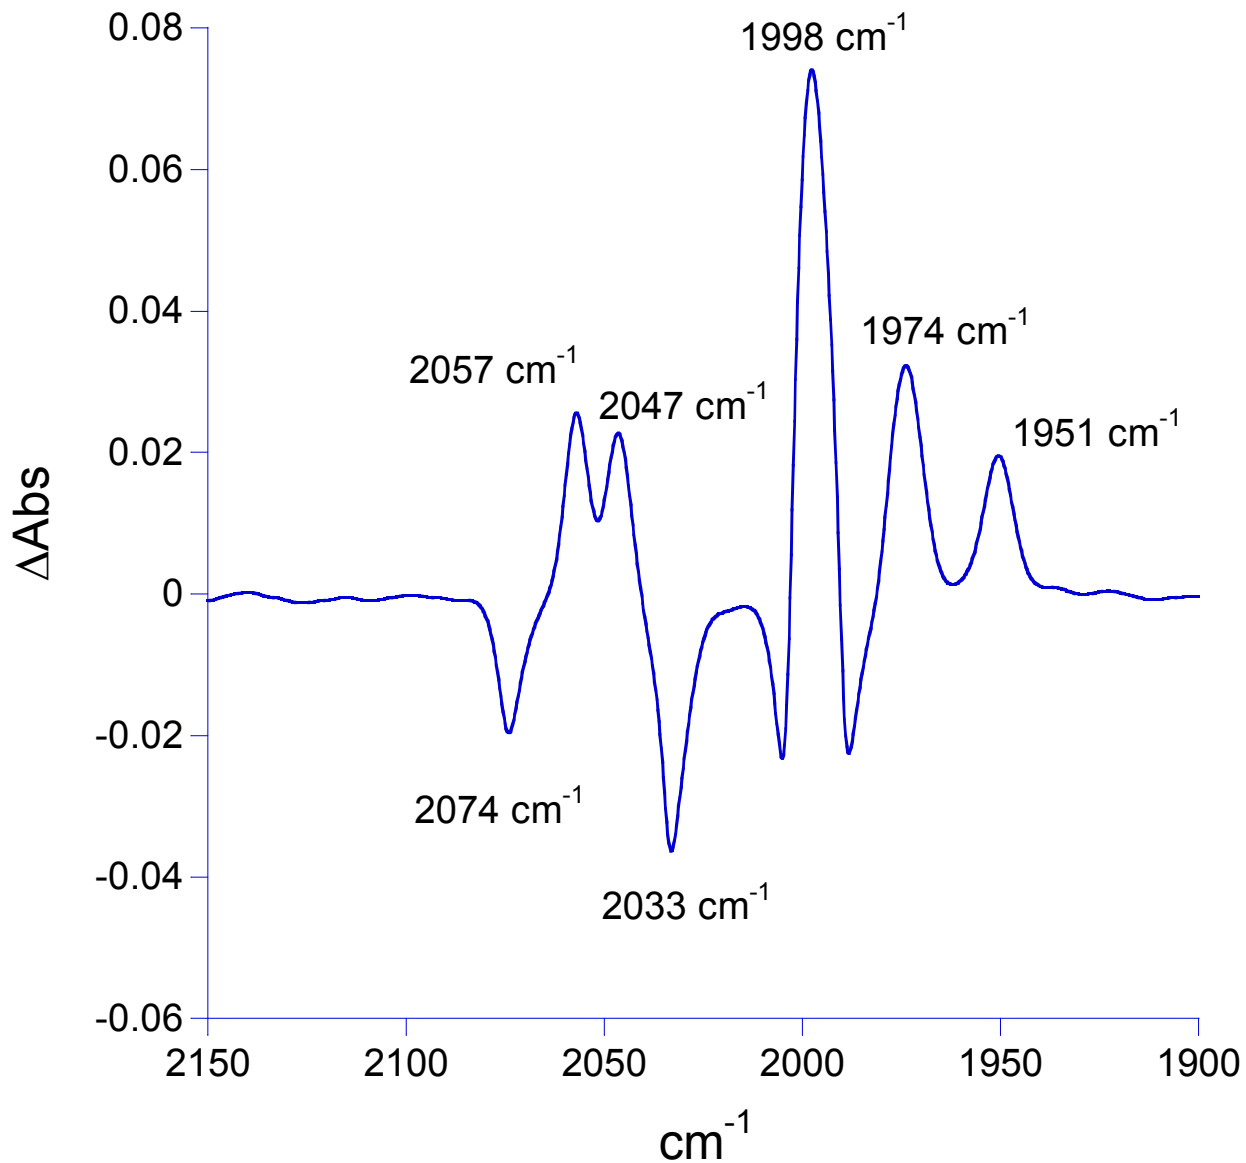

**Figure S-2:** Difference FTIR spectrum following photolysis of a cyclohexane solution of **1**-CO in the presence of *cis*-cyclooctene at 293K. Positive peaks are due to the **1**-( $\eta^2$ -cyclooctene) adduct while negative peaks are due to depletion of the parent upon photolysis.

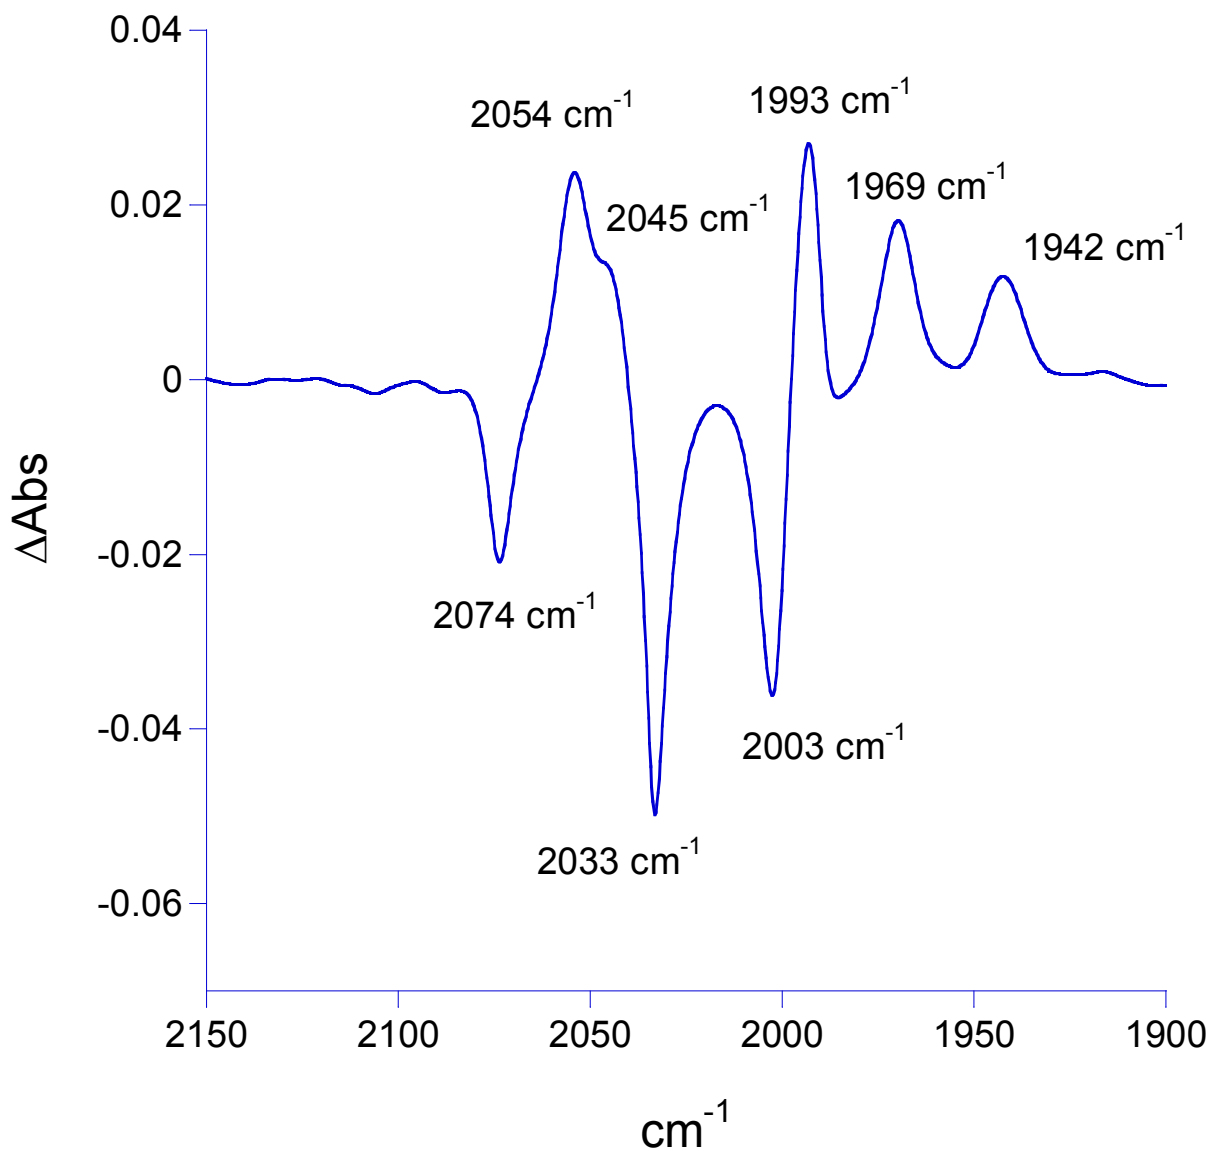

**Figure S-3:** Difference FTIR spectrum following photolysis of a cyclohexane solution of **1**-CO in the presence of DHF at 293K. Positive peaks are due to the **1**-( $\eta^2$ -DHF) adduct while negative peaks are due to depletion of the parent upon photolysis.

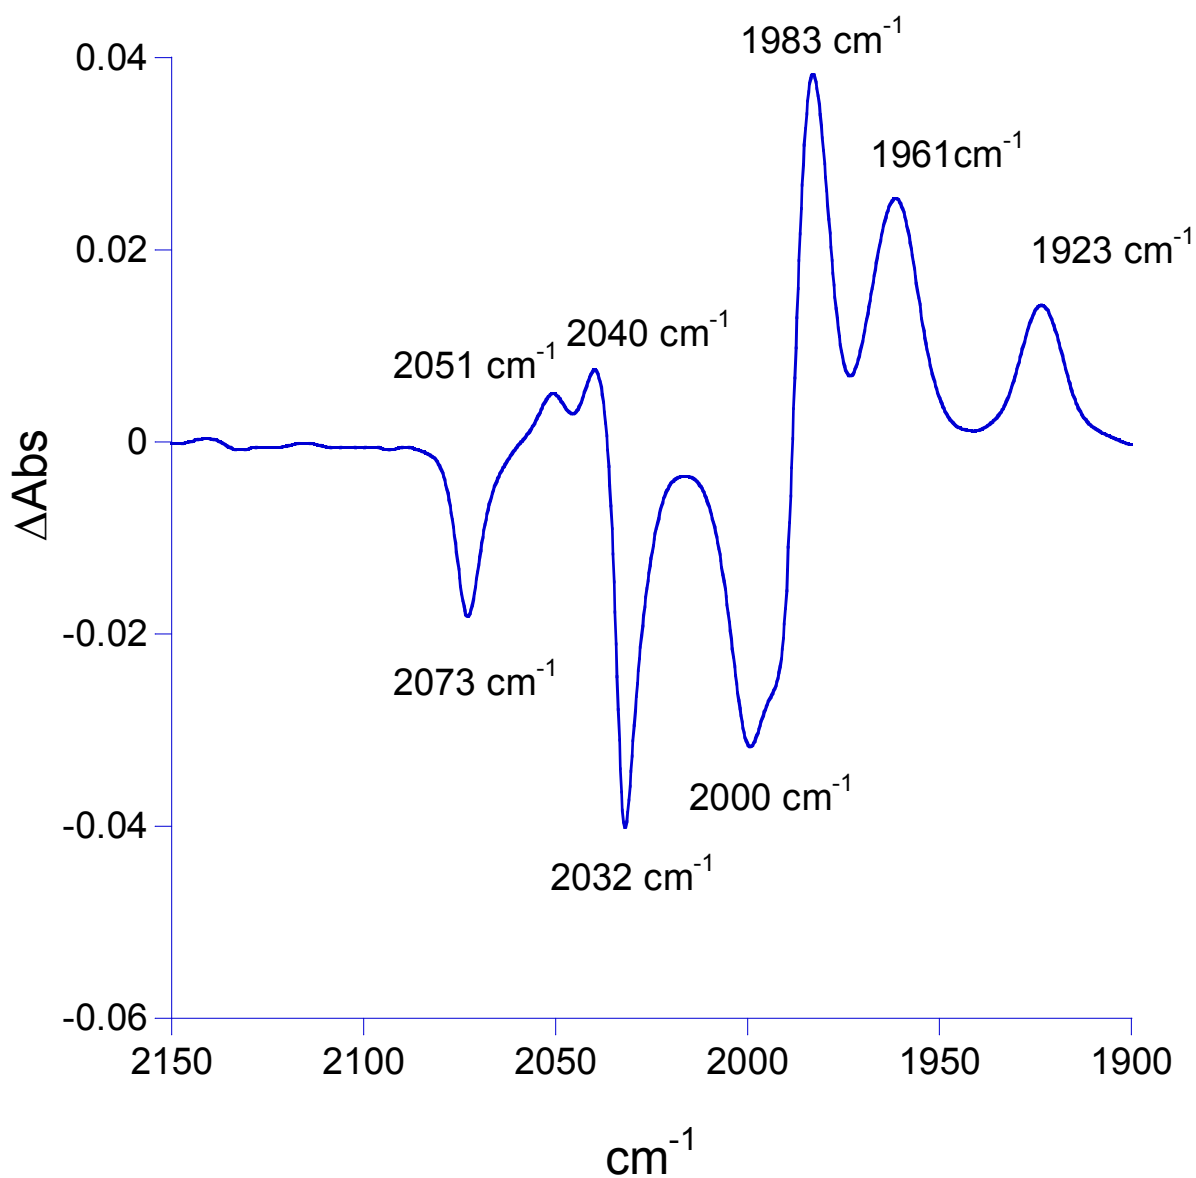

**Figure S-4:** Difference FTIR spectrum following photolysis of a cyclohexane solution of **1**-CO in the presence of THF at 293K. Positive peaks are due to the **1**-THF adduct while negative peaks are due to depletion of the parent upon photolysis.

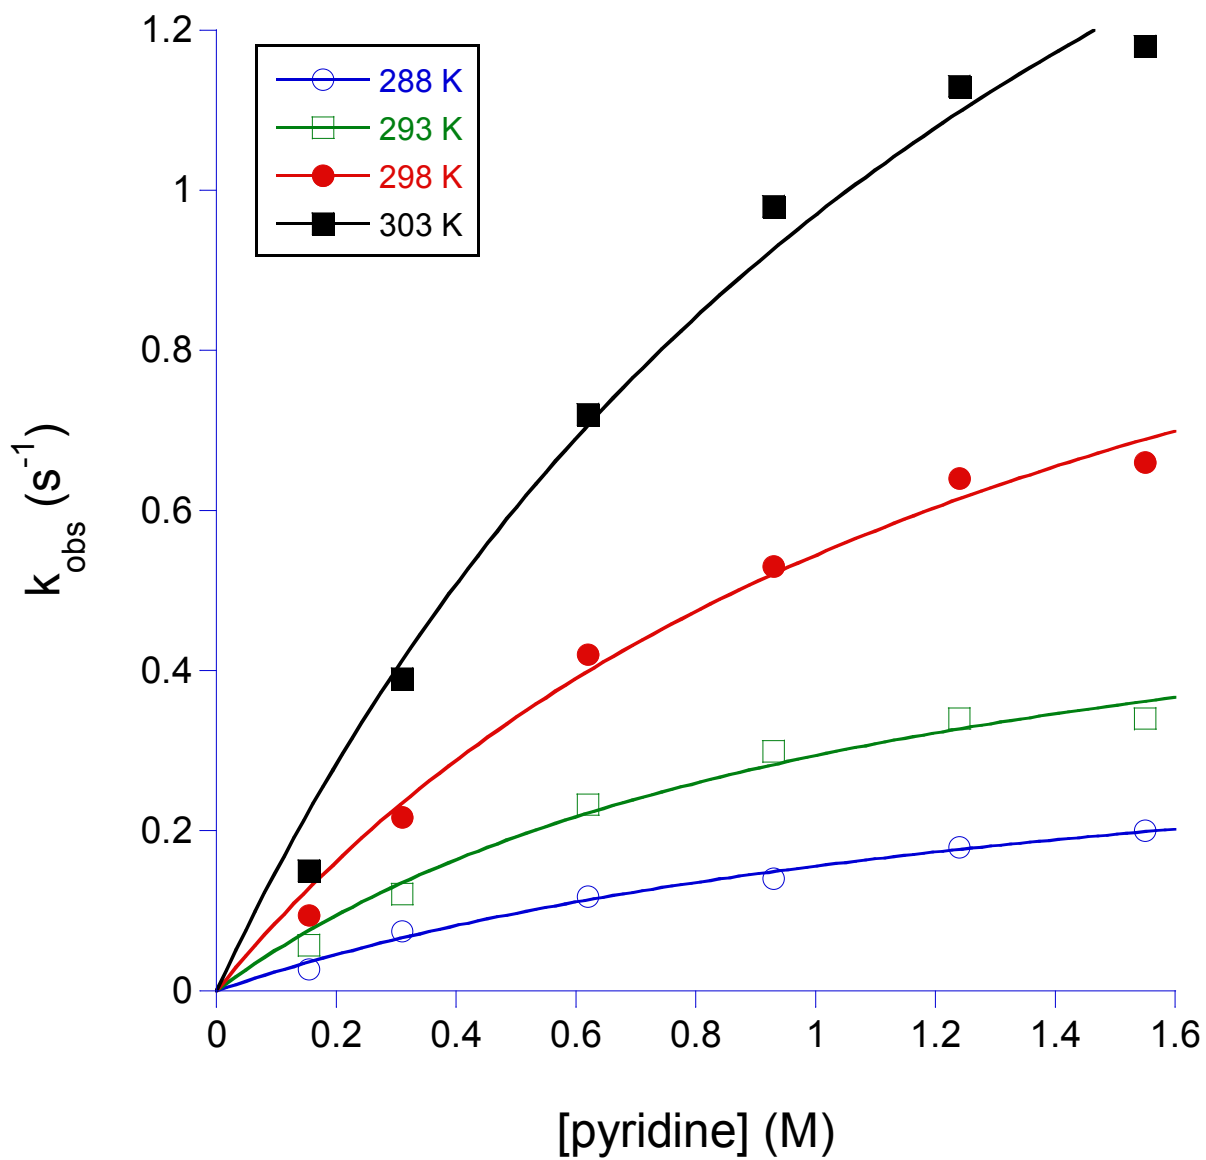

**Figure S-5:** A plot of  $k_{\text{obs}}$  vs. [pyridine] for the reaction:  $1-(\eta^2\text{-DHF}) + \text{pyridine} \rightarrow 1\text{-pyridine} + \text{DHF}$  at several temperatures. In this reaction, [DHF] was held constant at 3.3 M.
